# Supplementary material for: Chord: an ensemble machine learning algorithm to identify doublets in single-cell RNA sequencing data
Source: PubMed Central journal article supplement (PMC9151659; doi:10.1038/s42003-022-03476-9), 2022-05-30
Supplement: 42003_2022_3476_MOESM2_ESM.pdf [file 42003_2022_3476_MOESM2_ESM.pdf]

a

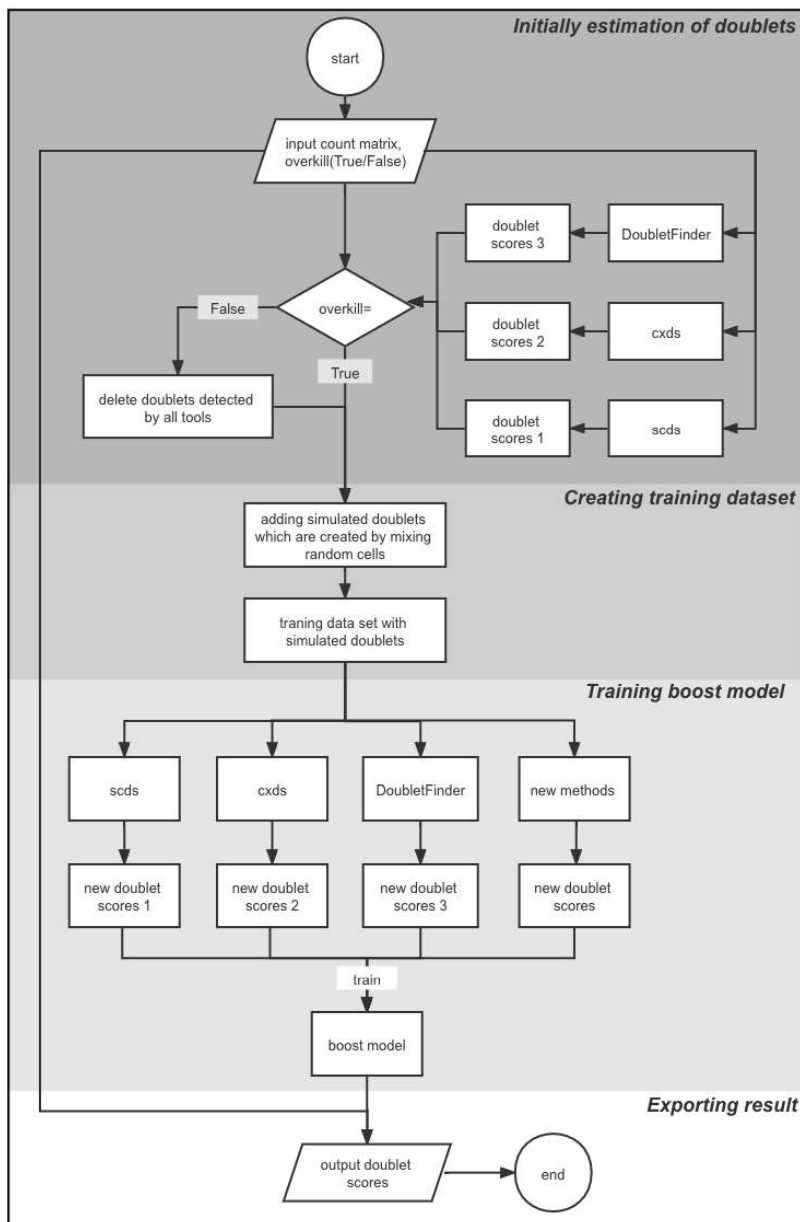

c

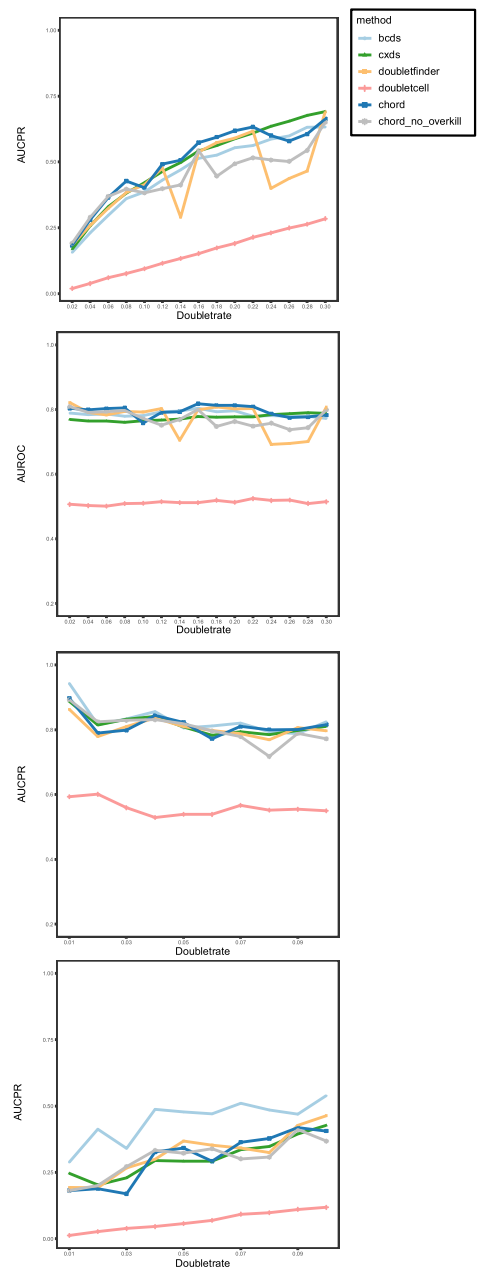

b

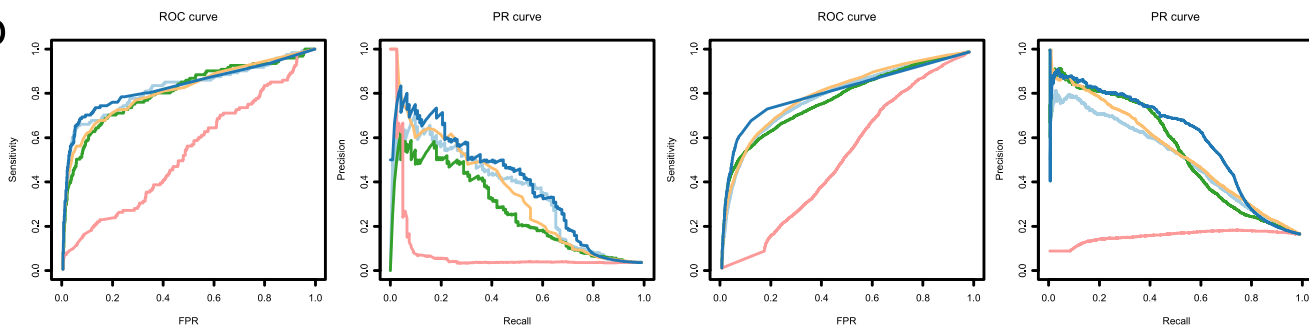

### Supplementary Figure 1. The flow chart of Chord

(a) The workflow of the Chord software is divided into four parts. The flow chart shows the data flow of the software.

(b) The receiver operating characteristic curves (ROC) and PR curve of Chord and the other four methods were drawn for the test DM-A (the first row) and HTO8 (the second row).

(c) We generated the HTO8 sub-datasets with doublet rate from 0.02 to 0.30 (the first two from the top) by randomly sampling the dataset, and the sub-datasets with doublet rate from 0.01 to 0.10 of the data set DM-A (the third and fourth from the top). The values of AUC and PAUC on these datasets are calculated respectively for Chord, Chord (overkill=F) and the other four methods.

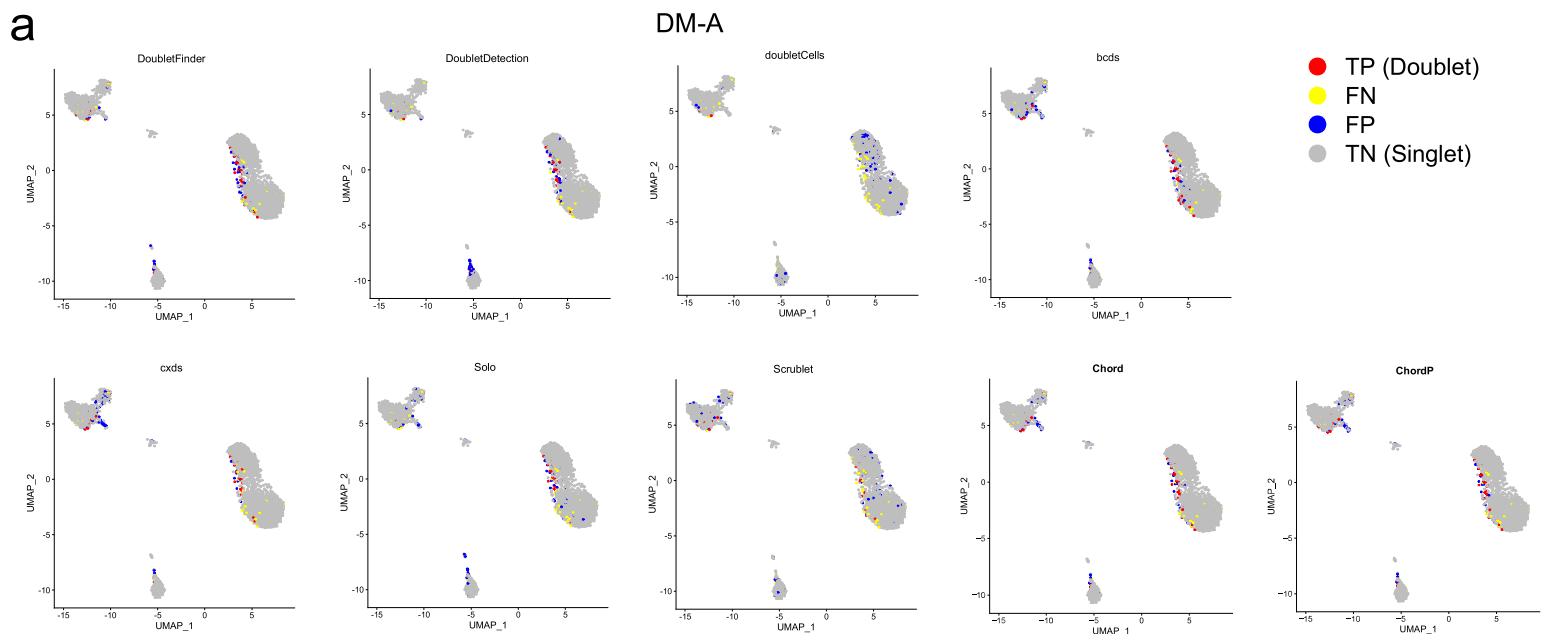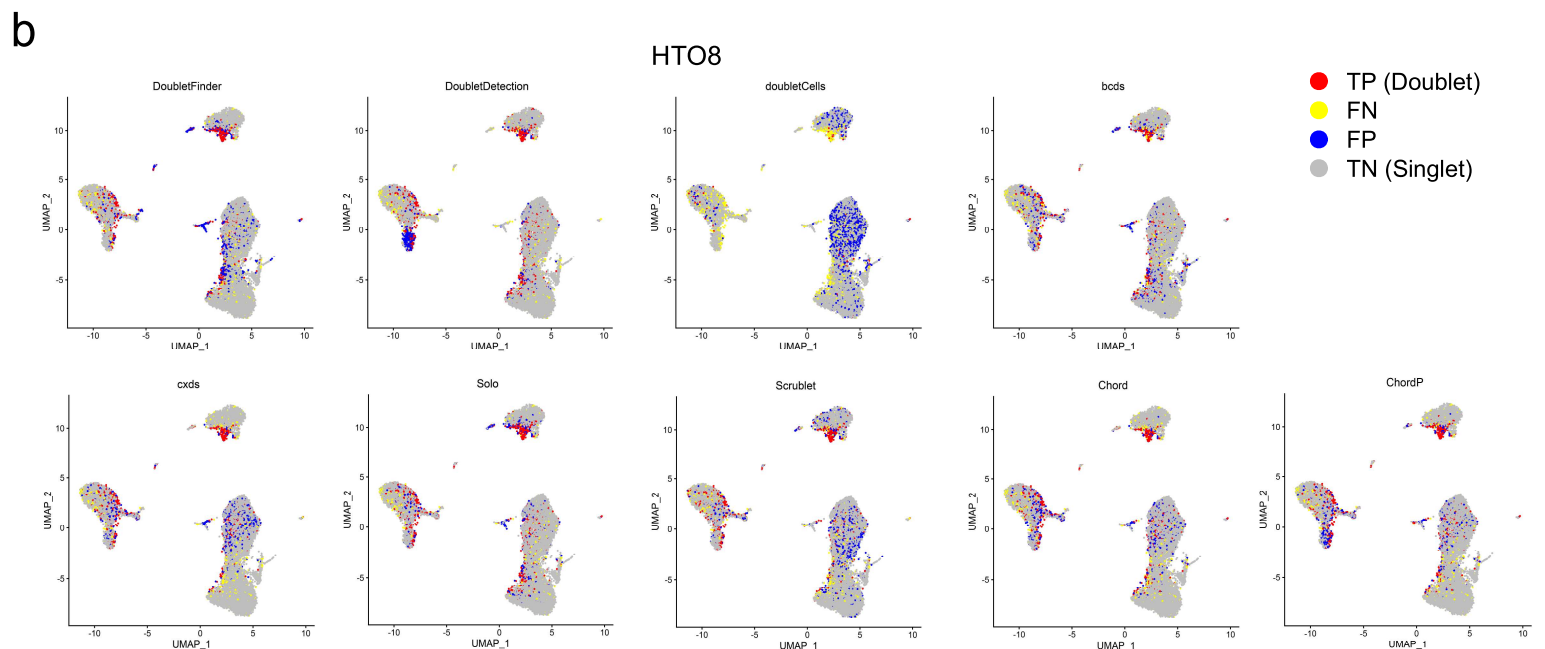

**c**

| DM-A |     |     |      |        |        |           |          |                  | HTO8 |      |      |       |        |        |           |          |                  |
|------|-----|-----|------|--------|--------|-----------|----------|------------------|------|------|------|-------|--------|--------|-----------|----------|------------------|
| TP   | FN  | FP  | TN   | TPR    | TNR    | Precision | Accuracy | Method           | TP   | FN   | FP   | TN    | TPR    | TNR    | Precision | Accuracy | Method           |
| 52   | 68  | 68  | 3110 | 0.4333 | 0.9786 | 0.4333    | 0.9588   | bcds             | 1349 | 1249 | 1249 | 12723 | 0.5192 | 0.9106 | 0.5192    | 0.8492   | bcds             |
| 46   | 74  | 74  | 3104 | 0.3833 | 0.9767 | 0.3833    | 0.9551   | cxds             | 1369 | 1229 | 1229 | 12743 | 0.5269 | 0.912  | 0.5269    | 0.8517   | cxds             |
| 56   | 64  | 64  | 3114 | 0.4667 | 0.9799 | 0.4667    | 0.9612   | Chord            | 1596 | 1002 | 1002 | 12970 | 0.6143 | 0.9283 | 0.6143    | 0.8791   | Chord            |
| 55   | 65  | 65  | 3113 | 0.4583 | 0.9795 | 0.4583    | 0.9606   | ChordP           | 1642 | 956  | 956  | 13016 | 0.632  | 0.9316 | 0.632     | 0.8846   | ChordP           |
| 11   | 109 | 109 | 3069 | 0.0917 | 0.9657 | 0.0917    | 0.9339   | doubletCells     | 264  | 2334 | 2334 | 11638 | 0.1016 | 0.833  | 0.1016    | 0.7183   | doubletCells     |
| 51   | 69  | 69  | 3109 | 0.425  | 0.9783 | 0.425     | 0.9582   | DoubletFinder    | 1349 | 1249 | 1249 | 12723 | 0.5192 | 0.9106 | 0.5192    | 0.8492   | DoubletFinder    |
| 45   | 75  | 75  | 3103 | 0.375  | 0.9764 | 0.375     | 0.9545   | DoubletDetection | 1594 | 1004 | 1004 | 12968 | 0.6135 | 0.9281 | 0.6135    | 0.8788   | DoubletDetection |
| 43   | 77  | 77  | 3101 | 0.3583 | 0.9758 | 0.3583    | 0.9533   | Scrublet         | 1291 | 1307 | 1307 | 12665 | 0.4969 | 0.9065 | 0.4969    | 0.8422   | Scrublet         |
| 32   | 88  | 88  | 3090 | 0.2667 | 0.9723 | 0.2667    | 0.9466   | Solo             | 1712 | 886  | 886  | 13086 | 0.659  | 0.9366 | 0.659     | 0.8931   | Solo             |

**Supplementary Figure 2. UMAP visualization of the DM-A and HTO8 datasets in terms of the doublet, singlet, FP and FN results.**

(a, b) For the real dataset DM-A (Figure.S2a) and dataset HTO8 (Figure.S2b), according to the scoring results of each method, we deleted the top scoring cells according to the real doublet rate, and verified with the real label to visually show the true positive (TP) doublet, true positive (TN) singlet, false positive (FP) and false negative (FN) results.

(c) TP, FN, FP, TN, True Positive Rate (TPR), True Negative Rate (TNR), Precision, Accuracy in DM-A (left) and HTO8 (right) data sets

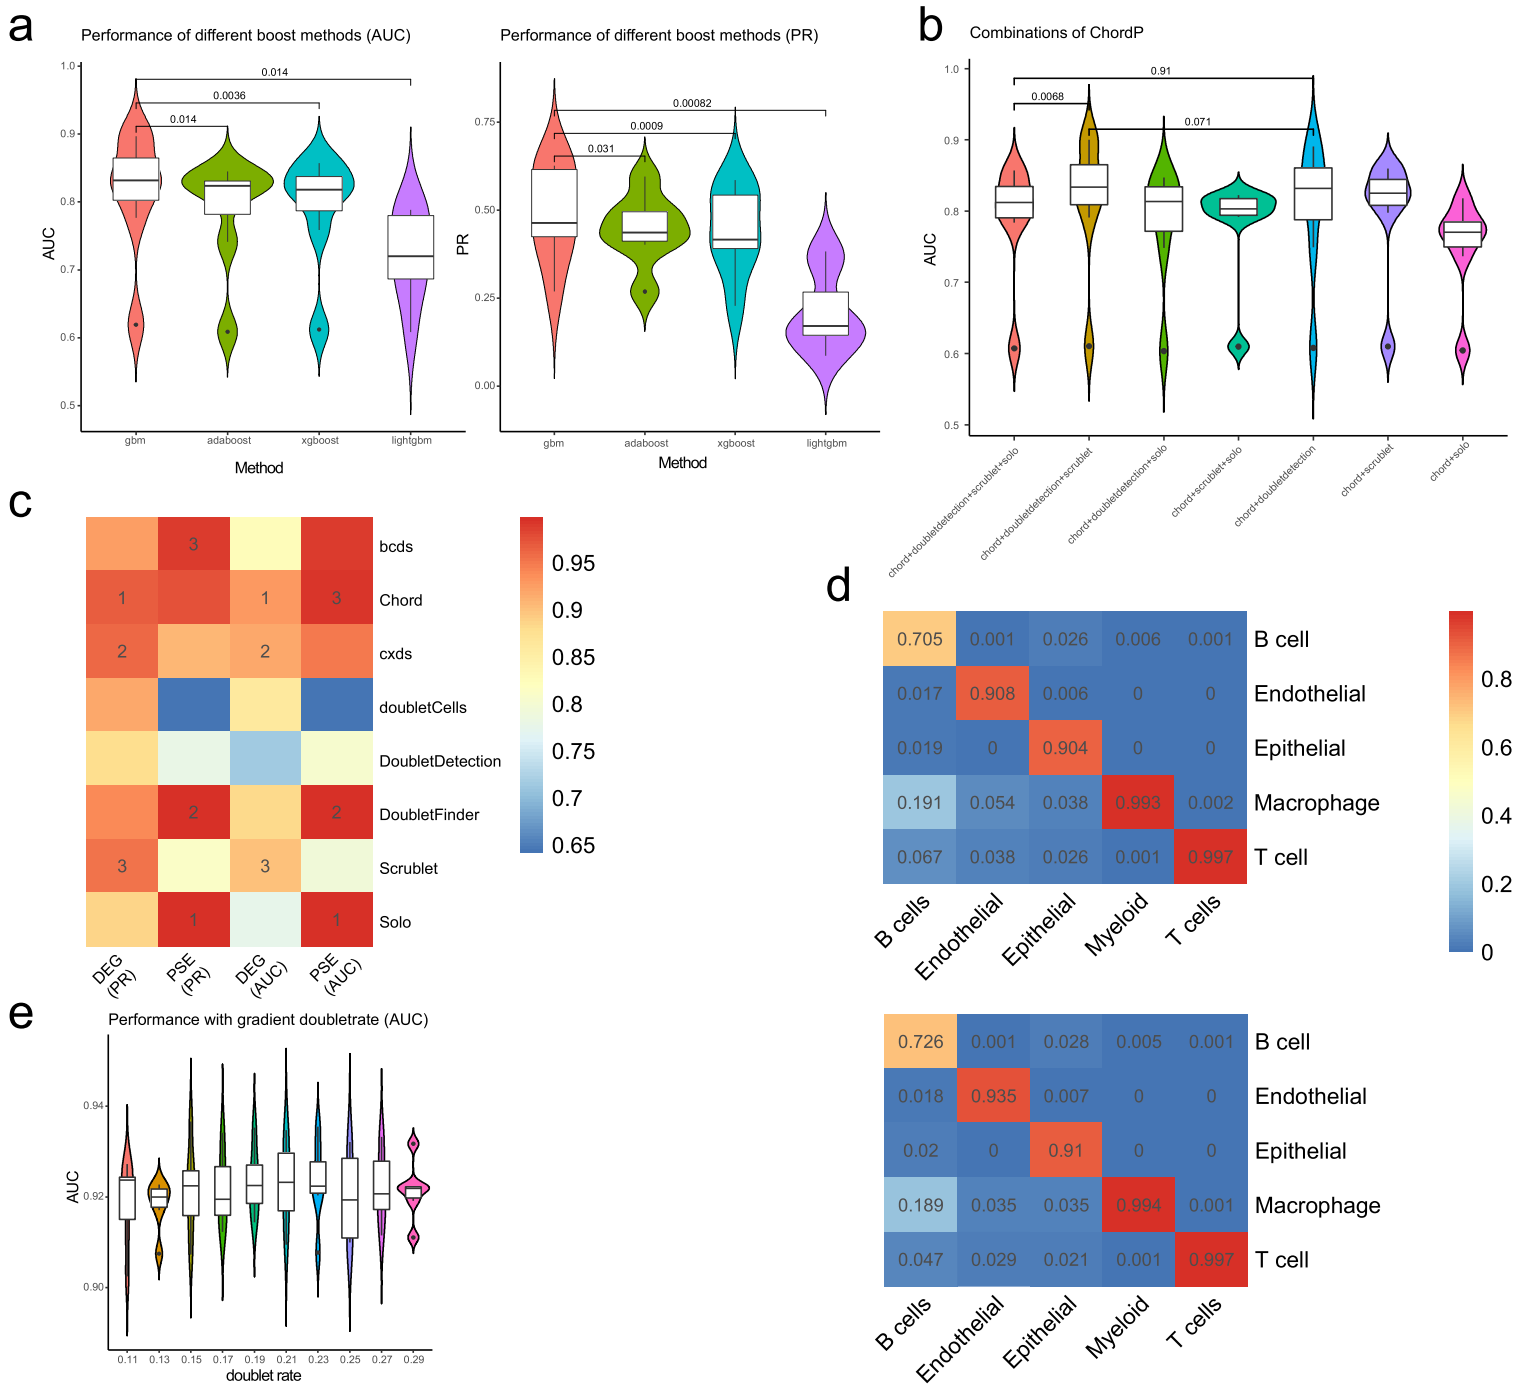

### Supplementary Figure 3. Parameter selection for Chord, and combination evaluation for ChordP.

(a) Chord's performance when using different boost algorithms. The evaluation data sets consist of HTO8, HTO12, DM-A, DM-B, DM-C, DM-2.1, DM-2.2 (paired t-test).

(b) The mean AUC of all combinations of ChordP across benchmarking datasets. The evaluation datasets consist of HTO8, HTO12, DM-A, DM-B, DM-C, DM-2.1, DM-2.2 (paired t-test).

(c) The heatmap of the PR and AUC values of the eight methods on the PSE and DEG datasets. The number in the figure indicates the rank of the method in the dataset (only the top three methods are marked).

(d) Automated cell type annotation of this data set was performed using SciBet. The training model provided by SciBet, which was trained from 42 human single-cell datasets containing 30 major human immune cell types, was used to automatically annotate the datasets before and after doublet removal. The matrix heatmaps are plotted with the SciBet scores.

(e) Chord's performance with different parameter doubletrate from 0.11 to 0.29 on six data sets. These 6 datasets were randomly sampled and generated by the DEG dataset, and the true doublet rate was 0.2.

| Supplementary Table 1. Overview of the computational methods for doublet detection and their capabilities |          |                              |                                                                                                                                                                                                                                                                                                                                                                        |         |                               |
|-----------------------------------------------------------------------------------------------------------|----------|------------------------------|------------------------------------------------------------------------------------------------------------------------------------------------------------------------------------------------------------------------------------------------------------------------------------------------------------------------------------------------------------------------|---------|-------------------------------|
| Method                                                                                                    | Platform | Category                     | Model Description                                                                                                                                                                                                                                                                                                                                                      | Version | Reference                     |
| DoubletFinder <sup>1</sup>                                                                                | R        | simulate artificial doublets | use simulated doublet generates simulated doublets and add them to original cells. on the basis of the fraction of simulated doublets in the neighborhood of each cell, calculating scores by pANN.                                                                                                                                                                    | 2.0.3   | McGinnis et al. (2019a)       |
| scrublet <sup>2,3</sup>                                                                                   | Python   | simulate artificial doublets | Generate simulated doublet data, cluster together with the original cells.in the principal component (PC) space, the proximity of cells to the doublet was evaluated by KNN algorithm.                                                                                                                                                                                 | 0.2.1   | Wolock et al. (2019)          |
| doubletCells <sup>4</sup><br>(scrnan)                                                                     | R        | simulate artificial doublets | It simulates doublets by adding two randomly selected cells, and calculates the proportion of simulated doublets of every cell to define the cells which are closed to many simulated doublets as doublets.                                                                                                                                                            | 1.16.0  | Lun et al., 2016              |
| bcdx <sup>5</sup>                                                                                         | R        | simulate artificial doublets | It generates simulated doublets by adding two randomly selected cells gene expression. Then mixing these simulated doublets with the original cells, and trains a gradient boosting classifier to classify the mixed cells into simulated doublets and original cells. The scores of each cell are defined as the frequency of being classified to simulated doublets. | 1.4.0   | A.S.Bais and D.Kostka.2019    |
| cxdx <sup>5</sup>                                                                                         | R        | calculate marker gene pair   | It calculates a p value for each pair of genes under the null hypothesis that the number of cells where exactly one of the two genes is expressed follows a binomial distribution, then it defines co-expressed gene pairs which are mostly expressed in doublets, and classify the doublets and singlets by the expression of co-expressed gene pairs.                | 1.4.0   | A.S.Bais and D.Kostka.2020    |
| solo <sup>6</sup>                                                                                         | Python   | simulate artificial doublets | Gene distribution was estimated according to randomly sampled cells, and then gene expression profile was extracted randomly to synthesize doublets. Combine the doublets with the original data and train the neural network to recognize.                                                                                                                            |         | Nicholas J. Bernstein et 2020 |
| DoubletDetection <sup>6</sup>                                                                             | Python   | simulate artificial doublets | A small number of simulated twin cells were generated by randomly sampling cells, and the possible doublets were calculated based on the distance algorithm. Then it executed a iterative calculation.                                                                                                                                                                 | 2.5.2   | Gayoso and Shor, 2018         |

Supplementary Table 2. Overview of the real scRNA-seq datasets with experimentally annotated doublets used in the study.

| Dataset                                            | Experimental method | Species | Tissue | Number of cells | Number of doublets | Median UMI count | Median gene count | doublet rate |
|----------------------------------------------------|---------------------|---------|--------|-----------------|--------------------|------------------|-------------------|--------------|
| Kang et al. Control PBMCs (DM-2.1) <sup>7</sup>    | Demuxlet            | Human   | PBMCS  | 14619           | 1512               | 1256             | 520               | 10.343       |
| Kang et al. Stimulated PBMCs (DM-2.2) <sup>7</sup> | Demuxlet            | Human   | PBMCS  | 14446           | 1552               | 1345             | 546               | 10.743       |
| Kang et al. A PBMCs (DM-A) <sup>7</sup>            | Demuxlet            | Human   | PBMCS  | 3298            | 120                | 973              | 384               | 3.639        |
| Kang et al. B PBMCs (DM-B) <sup>1</sup>            | Demuxlet            | Human   | PBMCS  | 3790            | 130                | 862              | 361               | 3.430        |
| Kang et al. C PBMCs (DM-C) <sup>7</sup>            | Demuxlet            | Human   | PBMCS  | 5270            | 316                | 829              | 352               | 5.996        |
| Stoeckius et al. Cell lines (HTO12) <sup>8</sup>   | Cell Hashing (ACOs) | Human   | PBMCS  | 8191            | 889                | 4636             | 2086              | 10.853       |
| Stoeckius et al. Cell lines (HTO8) <sup>8</sup>    | Cell Hashing (ACOs) | Human   | PBMCS  | 15583           | 2545               | 550              | 321               | 16.332       |

| Supplementary Table 3. AUC relative to DM-A dataset in Supplementary Figure 1b |       |       |               |             |       |                   |
|--------------------------------------------------------------------------------|-------|-------|---------------|-------------|-------|-------------------|
| rate                                                                           | bcds  | cxds  | doubletfinder | doubletcell | chord | chord_no_overkill |
| 0.01                                                                           | 0.943 | 0.888 | 0.863         | 0.593       | 0.897 | 0.893             |
| 0.02                                                                           | 0.816 | 0.815 | 0.779         | 0.601       | 0.789 | 0.824             |
| 0.03                                                                           | 0.833 | 0.833 | 0.809         | 0.559       | 0.798 | 0.829             |
| 0.04                                                                           | 0.856 | 0.841 | 0.836         | 0.529       | 0.844 | 0.831             |
| 0.05                                                                           | 0.806 | 0.808 | 0.810         | 0.539       | 0.823 | 0.819             |
| 0.06                                                                           | 0.812 | 0.782 | 0.798         | 0.539       | 0.772 | 0.796             |
| 0.07                                                                           | 0.821 | 0.794 | 0.788         | 0.567       | 0.810 | 0.779             |
| 0.08                                                                           | 0.793 | 0.785 | 0.769         | 0.552       | 0.800 | 0.717             |
| 0.09                                                                           | 0.788 | 0.797 | 0.806         | 0.555       | 0.801 | 0.789             |
| 0.1                                                                            | 0.824 | 0.810 | 0.797         | 0.550       | 0.816 | 0.772             |

| Supplementary Table 4. AUC relative to HTO8 dataset in Supplementary Figure 1b |       |       |               |             |       |                   |
|--------------------------------------------------------------------------------|-------|-------|---------------|-------------|-------|-------------------|
| rate                                                                           | bcds  | cxds  | doubletfinder | doubletcell | Chord | chord_no_overkill |
| 0.02                                                                           | 0.789 | 0.769 | 0.821         | 0.507       | 0.803 | 0.809             |
| 0.04                                                                           | 0.784 | 0.764 | 0.790         | 0.503       | 0.799 | 0.791             |
| 0.06                                                                           | 0.786 | 0.765 | 0.783         | 0.501       | 0.802 | 0.793             |
| 0.08                                                                           | 0.779 | 0.761 | 0.794         | 0.509       | 0.805 | 0.797             |
| 0.12                                                                           | 0.793 | 0.767 | 0.803         | 0.515       | 0.791 | 0.751             |
| 0.14                                                                           | 0.794 | 0.770 | 0.705         | 0.512       | 0.793 | 0.769             |
| 0.16                                                                           | 0.803 | 0.778 | 0.799         | 0.512       | 0.818 | 0.800             |
| 0.18                                                                           | 0.793 | 0.776 | 0.807         | 0.519       | 0.812 | 0.747             |
| 0.1                                                                            | 0.781 | 0.765 | 0.792         | 0.510       | 0.758 | 0.772             |
| 0.22                                                                           | 0.779 | 0.777 | 0.803         | 0.525       | 0.808 | 0.749             |
| 0.24                                                                           | 0.781 | 0.784 | 0.692         | 0.519       | 0.786 | 0.758             |
| 0.26                                                                           | 0.779 | 0.787 | 0.695         | 0.520       | 0.775 | 0.737             |
| 0.28                                                                           | 0.779 | 0.790 | 0.701         | 0.509       | 0.777 | 0.744             |
| 0.2                                                                            | 0.796 | 0.777 | 0.801         | 0.513       | 0.812 | 0.763             |
| 0.3                                                                            | 0.772 | 0.788 | 0.807         | 0.514       | 0.783 | 0.799             |

| Supplementary Table 5. PR relative to DM-A dataset in Supplementary Figure 1b |       |       |               |             |       |                   |
|-------------------------------------------------------------------------------|-------|-------|---------------|-------------|-------|-------------------|
| rate                                                                          | bcds  | cxds  | doubletfinder | doubletcell | chord | chord_no_overkill |
| 0.01                                                                          | 0.289 | 0.247 | 0.193         | 0.013       | 0.182 | 0.182             |
| 0.02                                                                          | 0.413 | 0.204 | 0.192         | 0.027       | 0.189 | 0.200             |
| 0.03                                                                          | 0.341 | 0.230 | 0.267         | 0.039       | 0.169 | 0.272             |
| 0.04                                                                          | 0.487 | 0.295 | 0.299         | 0.046       | 0.327 | 0.333             |
| 0.05                                                                          | 0.478 | 0.292 | 0.368         | 0.057       | 0.342 | 0.322             |
| 0.06                                                                          | 0.470 | 0.293 | 0.353         | 0.069       | 0.292 | 0.340             |
| 0.07                                                                          | 0.511 | 0.335 | 0.342         | 0.093       | 0.364 | 0.301             |
| 0.08                                                                          | 0.485 | 0.348 | 0.324         | 0.098       | 0.378 | 0.307             |
| 0.09                                                                          | 0.470 | 0.395 | 0.427         | 0.111       | 0.419 | 0.411             |
| 0.1                                                                           | 0.539 | 0.428 | 0.464         | 0.118       | 0.406 | 0.368             |



| Supplementary Table 6. PR relative to HTO8 dataset in Supplementary Figure 1b |       |       |               |             |       |                   |
|-------------------------------------------------------------------------------|-------|-------|---------------|-------------|-------|-------------------|
| rate                                                                          | bcds  | exds  | doubletfinder | doubletcell | chord | chord_no_overkill |
| 0.02                                                                          | 0.156 | 0.168 | 0.185         | 0.020       | 0.183 | 0.191             |
| 0.04                                                                          | 0.231 | 0.258 | 0.259         | 0.038       | 0.280 | 0.289             |
| 0.06                                                                          | 0.297 | 0.330 | 0.324         | 0.060       | 0.365 | 0.369             |
| 0.08                                                                          | 0.360 | 0.382 | 0.383         | 0.076       | 0.427 | 0.397             |
| 0.12                                                                          | 0.431 | 0.464 | 0.477         | 0.115       | 0.491 | 0.399             |
| 0.14                                                                          | 0.470 | 0.497 | 0.290         | 0.133       | 0.507 | 0.412             |
| 0.16                                                                          | 0.514 | 0.542 | 0.538         | 0.152       | 0.573 | 0.543             |
| 0.18                                                                          | 0.526 | 0.562 | 0.574         | 0.173       | 0.594 | 0.446             |
| 0.1                                                                           | 0.386 | 0.422 | 0.415         | 0.095       | 0.403 | 0.382             |
| 0.22                                                                          | 0.563 | 0.609 | 0.617         | 0.214       | 0.633 | 0.516             |
| 0.24                                                                          | 0.587 | 0.635 | 0.400         | 0.230       | 0.600 | 0.507             |
| 0.26                                                                          | 0.598 | 0.655 | 0.437         | 0.249       | 0.579 | 0.502             |
| 0.28                                                                          | 0.632 | 0.677 | 0.465         | 0.263       | 0.606 | 0.544             |
| 0.2                                                                           | 0.554 | 0.588 | 0.590         | 0.190       | 0.618 | 0.493             |
| 0.3                                                                           | 0.633 | 0.691 | 0.691         | 0.284       | 0.663 | 0.651             |

Supplementary Table 7. AUC relative to combinations of ChordP in Supplementary Figure 3b

|        | chord+doubletetection+scrublet+solo | chord+doubletetection+scrublet | chord+doubletetection+solo | chord+scrublet+solo | chord+doubletetection | chord+scrublet | chord+solo |
|--------|-------------------------------------|--------------------------------|----------------------------|---------------------|-----------------------|----------------|------------|
| MD-A   | 0.820                               | 0.833                          | 0.824                      | 0.822               | 0.832                 | 0.831          | 0.818      |
| DM-B   | 0.784                               | 0.791                          | 0.748                      | 0.791               | 0.754                 | 0.798          | 0.742      |
| DM-C   | 0.812                               | 0.827                          | 0.813                      | 0.796               | 0.826                 | 0.818          | 0.778      |
| DM-2.1 | 0.849                               | 0.896                          | 0.841                      | 0.816               | 0.887                 | 0.858          | 0.763      |
| DM-2.2 | 0.857                               | 0.900                          | 0.847                      | 0.820               | 0.890                 | 0.860          | 0.770      |
| HTO12  | 0.607                               | 0.610                          | 0.603                      | 0.610               | 0.608                 | 0.610          | 0.604      |
| HTO8   | 0.797                               | 0.835                          | 0.795                      | 0.803               | 0.834                 | 0.825          | 0.791      |
| Mean   | 0.789                               | 0.813                          | 0.782                      | 0.780               | 0.805                 | 0.800          | 0.752      |
| AUC    |                                     |                                |                            |                     |                       |                |            |

Supplementary Table 8. AUC relative to parameter doubletrate in Supplementary Figure 3e

|          | 0.11  | 0.13  | 0.15  | 0.17  | 0.19  | 0.21  | 0.23  | 0.25  | 0.27  | 0.29  | correlation | p-value |
|----------|-------|-------|-------|-------|-------|-------|-------|-------|-------|-------|-------------|---------|
| data1    | 0.912 | 0.921 | 0.920 | 0.922 | 0.914 | 0.928 | 0.930 | 0.910 | 0.921 | 0.922 | 0.224       | 0.533   |
| data2    | 0.938 | 0.942 | 0.933 | 0.934 | 0.928 | 0.935 | 0.935 | 0.930 | 0.935 | 0.934 | -0.419      | 0.228   |
| data3    | 0.899 | 0.904 | 0.895 | 0.901 | 0.908 | 0.908 | 0.900 | 0.911 | 0.910 | 0.923 | 0.777       | 0.008   |
| data4    | 0.919 | 0.915 | 0.906 | 0.916 | 0.914 | 0.921 | 0.926 | 0.911 | 0.907 | 0.860 | -0.520      | 0.123   |
| data5    | 0.935 | 0.942 | 0.936 | 0.937 | 0.933 | 0.939 | 0.931 | 0.936 | 0.929 | 0.927 | -0.703      | 0.023   |
| data6    | 0.922 | 0.933 | 0.933 | 0.931 | 0.929 | 0.928 | 0.927 | 0.931 | 0.926 | 0.928 | -0.094      | 0.797   |
| mean AUC | 0.921 | 0.926 | 0.921 | 0.924 | 0.921 | 0.927 | 0.925 | 0.921 | 0.921 | 0.916 | -0.380      | 0.279   |

| Supplementary Table 9. Data source |                                  |                                                                                                                                                                   |
|------------------------------------|----------------------------------|-------------------------------------------------------------------------------------------------------------------------------------------------------------------|
| Resource                           | Source                           | Location                                                                                                                                                          |
| Control PBMCs (DM-2.1)             | Kang <i>et al.</i> ,2018         | downloaded from the GEO with the accession GSE96583                                                                                                               |
| Stimulated PBMCs (DM-2.2)          | Kang <i>et al.</i> ,2018         | downloaded from the GEO with the accession GSE96583                                                                                                               |
| A PBMCs (DM-A)                     | Kang <i>et al.</i> ,2018         | downloaded from the GEO with the accession GSE96583                                                                                                               |
| A PBMCs (DM-B)                     | Kang <i>et al.</i> ,2018         | downloaded from the GEO with the accession GSE96583                                                                                                               |
| A PBMCs (DM-C)                     | Kang <i>et al.</i> ,2018         | downloaded from the GEO with the accession GSE96583                                                                                                               |
| A PBMCs (HTO12)                    | Stoeckius <i>et al.</i> ,2018    | <a href="https://www.dropbox.com/sh/ntc33ium7cg1za1/AAD_8XIDmu4F7lJ-5sp-rGFYa?dl=0">https://www.dropbox.com/sh/ntc33ium7cg1za1/AAD_8XIDmu4F7lJ-5sp-rGFYa?dl=0</a> |
| A PBMCs (HTO8)                     | Stoeckius <i>et al.</i> ,2018    | <a href="https://www.dropbox.com/sh/ntc33ium7cg1za1/AAD_8XIDmu4F7lJ-5sp-rGFYa?dl=0">https://www.dropbox.com/sh/ntc33ium7cg1za1/AAD_8XIDmu4F7lJ-5sp-rGFYa?dl=0</a> |
| DEG test dataset                   | Nan Miles Xi <i>et al.</i> ,2019 | <a href="https://zenodo.org/record/4062232#.X3YR9Hn0kuU%E3%80%82">https://zenodo.org/record/4062232#.X3YR9Hn0kuU%E3%80%82</a>                                     |
| Trajectory test dataset            | Nan Miles Xi <i>et al.</i> ,2019 | <a href="https://zenodo.org/record/4062232#.X3YR9Hn0kuU%E3%80%82">https://zenodo.org/record/4062232#.X3YR9Hn0kuU%E3%80%82</a>                                     |
| Lung cancer tumour dataset         | Lambrechts <i>et al.</i> , 2018  | <a href="https://gbiomed.kuleuven.be/scRNAseq-NSCLC">https://gbiomed.kuleuven.be/scRNAseq-NSCLC</a>                                                               |

## Supplementary References

- 1 McGinnis, C. S., Murrow, L. M. & Gartner, Z. J. DoubletFinder: Doublet Detection in Single-Cell RNA Sequencing Data Using Artificial Nearest Neighbors. *Cell Systems* **8**, 329-337.e324, doi:10.1016/j.cels.2019.03.003 (2019).
- 2 Wolock, S. L., Lopez, R. & Klein, A. M. Scrublet: Computational Identification of Cell Doublets in Single-Cell Transcriptomic Data. *Cell Syst* **8**, 281-291.e289, doi:10.1016/j.cels.2018.11.005 (2019).
- 3 Bernstein, N. J. *et al.* Solo: Doublet Identification in Single-Cell RNA-Seq via Semi-Supervised Deep Learning. *Cell Systems* **11**, 95-101.e105, doi:10.1016/j.cels.2020.05.010 (2020).
- 4 Lun, A. T., McCarthy, D. J. & Marioni, J. C. A step-by-step workflow for low-level analysis of single-cell RNA-seq data with Bioconductor. *F1000Res* **5**, 2122, doi:10.12688/f1000research.9501.2 (2016).
- 5 Bais, A. S. & Kostka, D. scds: computational annotation of doublets in single-cell RNA sequencing data. *Bioinformatics* **36**, 1150-1158, doi:10.1093/bioinformatics/btz698 (2020).
- 6 DePasquale, E. A. K. *et al.* DoubletDecon: Deconvoluting Doublets from Single-Cell RNA-Sequencing Data. *Cell Rep* **29**, 1718-1727 e1718, doi:10.1016/j.celrep.2019.09.082 (2019).
- 7 Kang, H. M. *et al.* Multiplexed droplet single-cell RNA-sequencing using natural genetic variation. *Nat Biotechnol* **36**, 89-94, doi:10.1038/nbt.4042 (2018).
- 8 Stoeckius, M. *et al.* Cell Hashing with barcoded antibodies enables multiplexing and doublet detection for single cell genomics. *Genome Biol* **19**, 224, doi:10.1186/s13059-018-1603-1 (2018).
