# Supplementary material for: Chord: an ensemble machine learning algorithm to identify doublets in single-cell RNA sequencing data
Source: PubMed Central journal article supplement (PMC9151659; doi:10.1038/s42003-022-03476-9), 2022-05-30
Supplement: 42003_2022_3476_MOESM3_ESM.pdf [file 42003_2022_3476_MOESM3_ESM.pdf]

## **Description of Additional Supplementary Files**

**File name:** Supplementary Data 1

**Description:** Values of PAUC&PR for all methods in Table 1 in each dataset

**File name:** Supplementary Data 2

**Description:** Rank values relative to Figure 2c

**File name:** Supplementary Data 3

**Description:** Time-consumption based on cell gradient

**File name:** Supplementary Data 4

**Description:** Metadata of Figure 4
